# Supplementary material
Source: publisher site journal article supplement (https://www.dovepress.com/get_supplementary_file.php?f=223598.docx)
Supplement: Supplementary file 1 [file get_supplementary_file.php]

Supplementary material


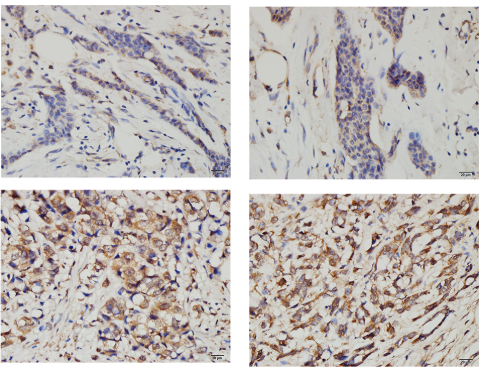


**Figure S1** Typical staining image of ZEB2 in four types of breast cancer. ZEB2 mainly showed negative and weak positive staining in luminal A and luminal B breast cancer, weak and moderate positive staining in HER-2 positive breast cancer, and strong positive staining in TNBC breast cancer.
